# Supplementary material for: Expansion of Multipotent Stem Cells from the Adult Human Brain
Source: PubMed Central journal article supplement (PMC3743777; doi:10.1371/journal.pone.0071334), 2013-08-14

INNER ZONE

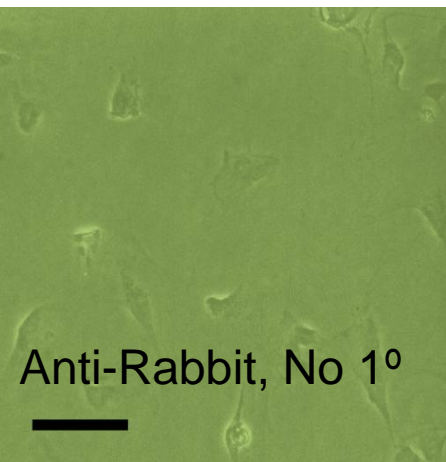

INTERMEDIATE ZONE

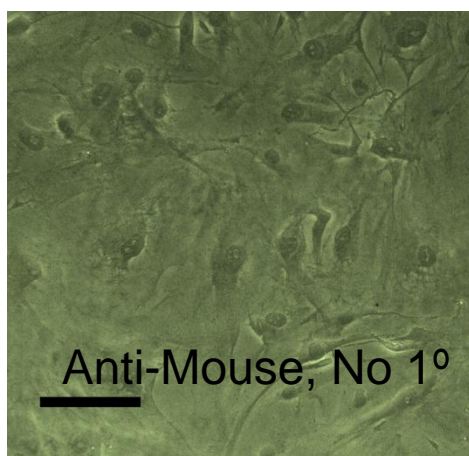

OUTER ZONE

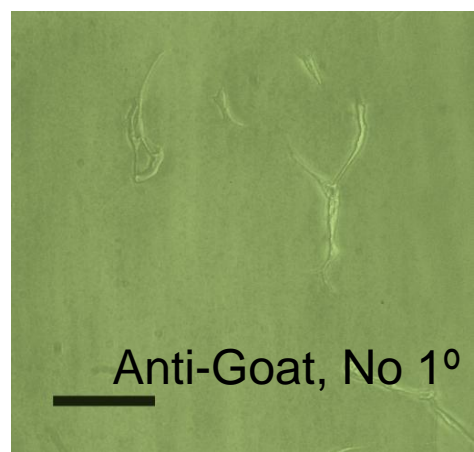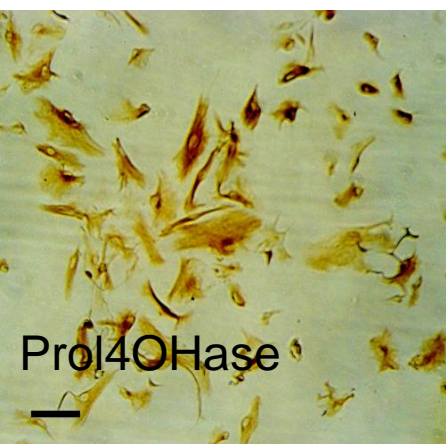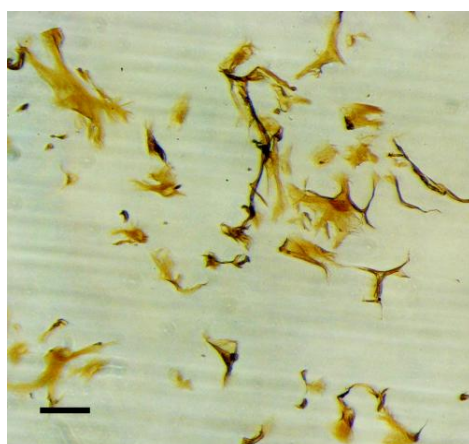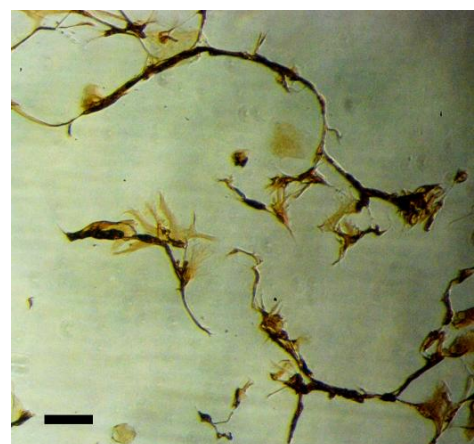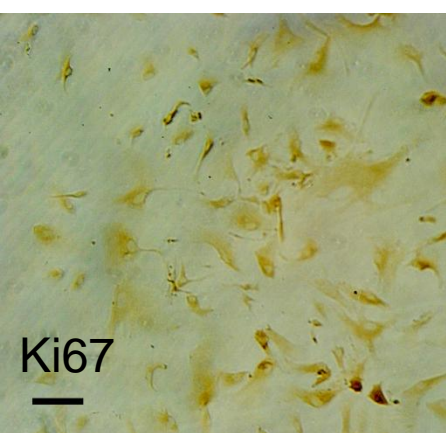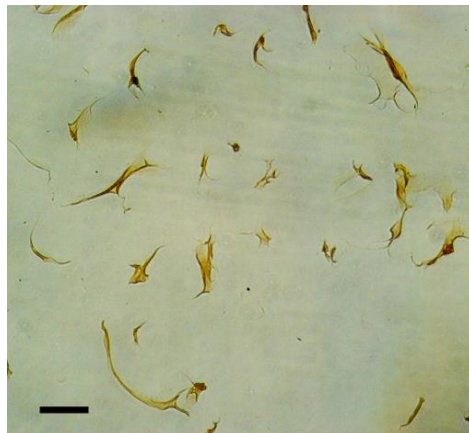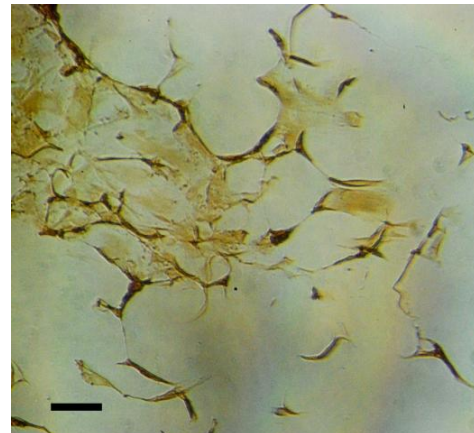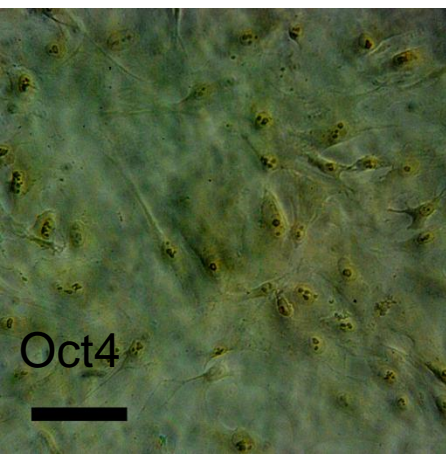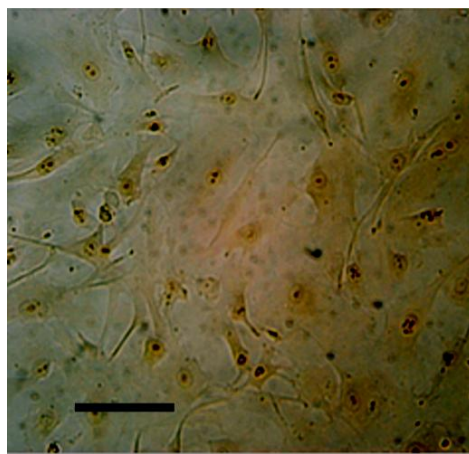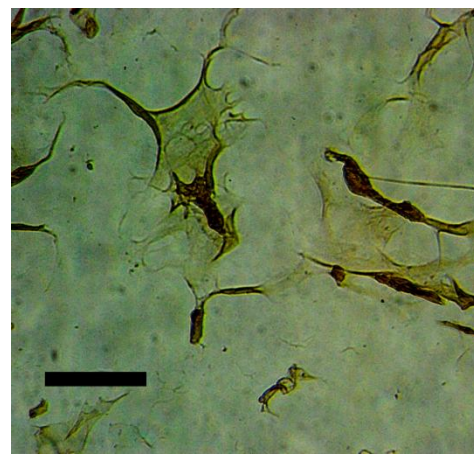

INNER ZONE

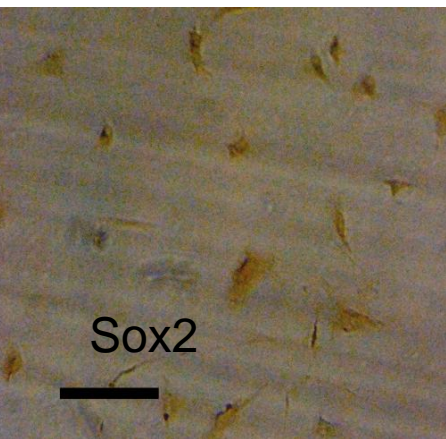

INTERMEDIATE ZONE

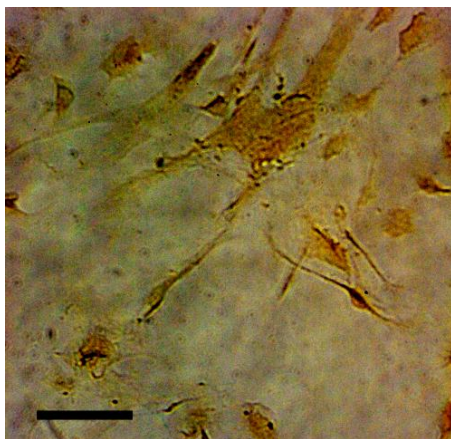

OUTER ZONE

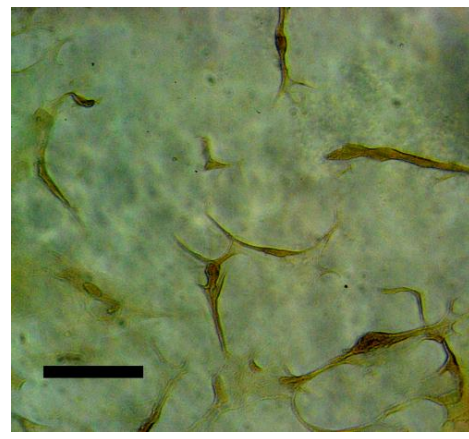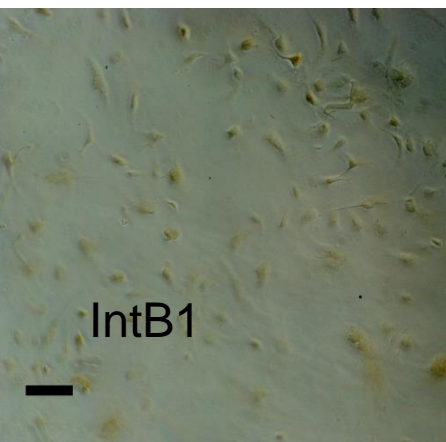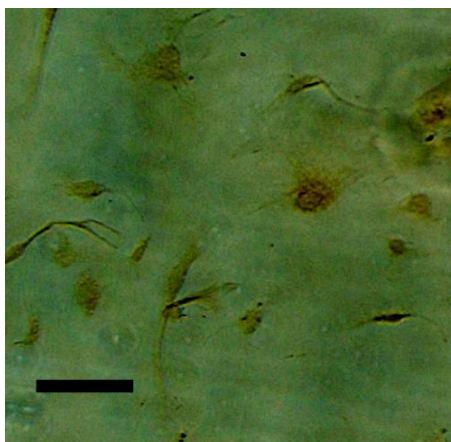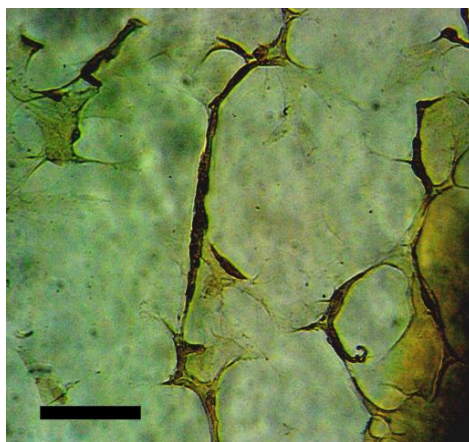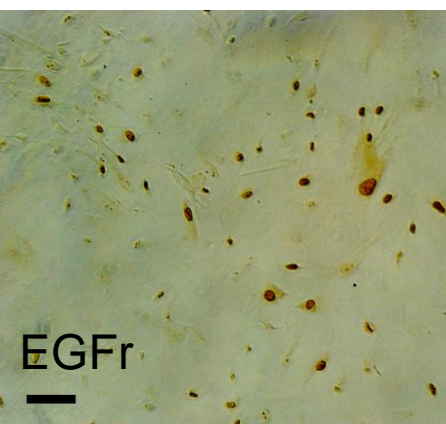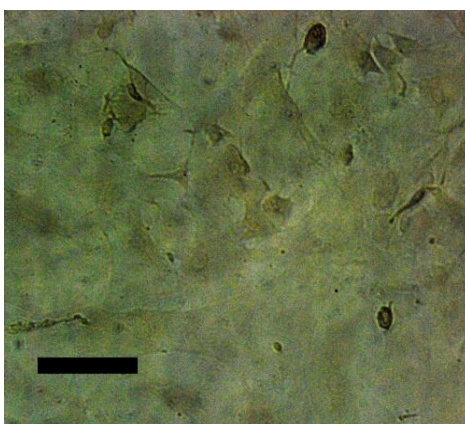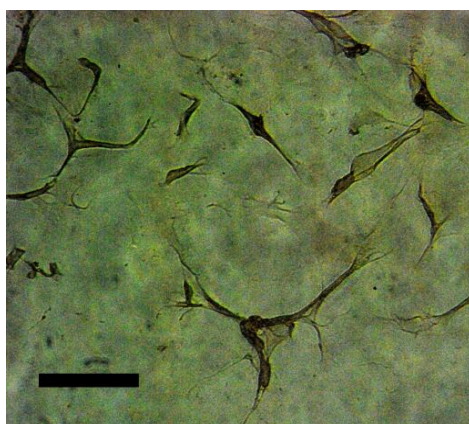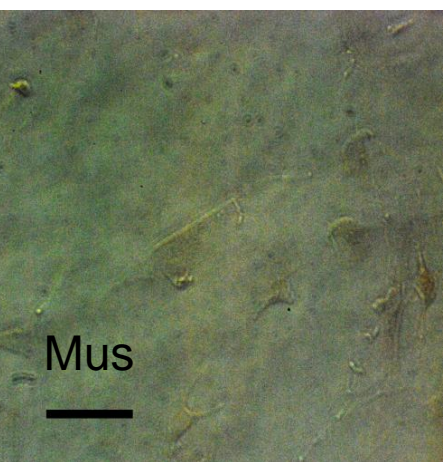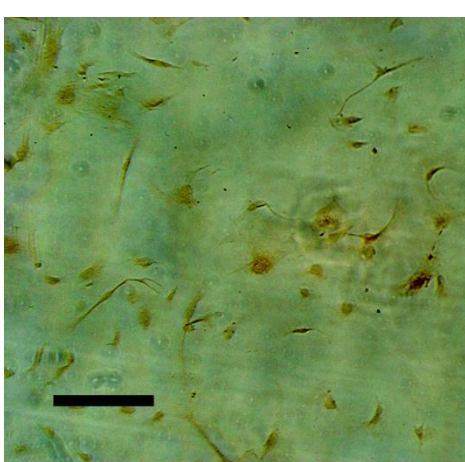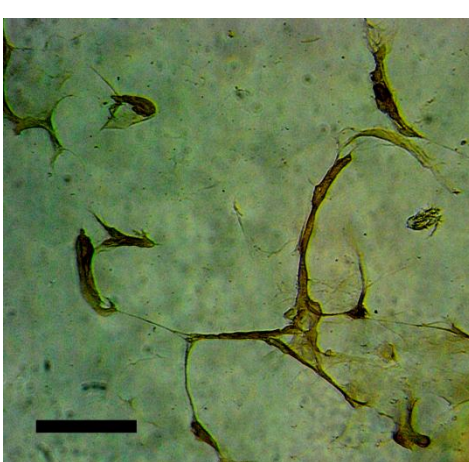

INNER ZONE

INTERMEDIATE ZONE

OUTER ZONE

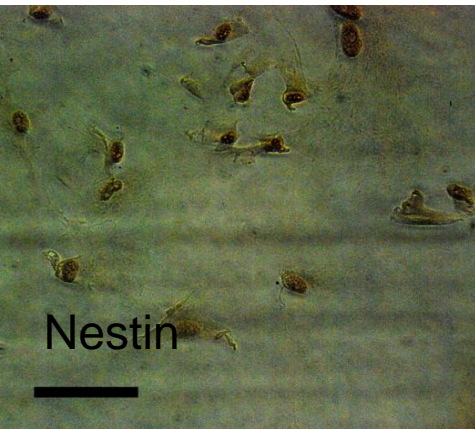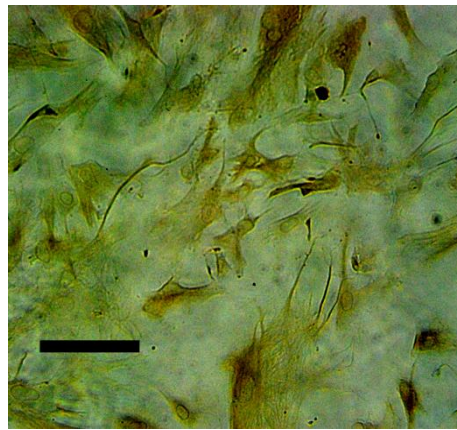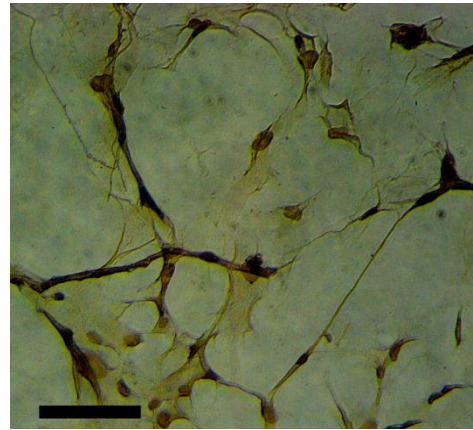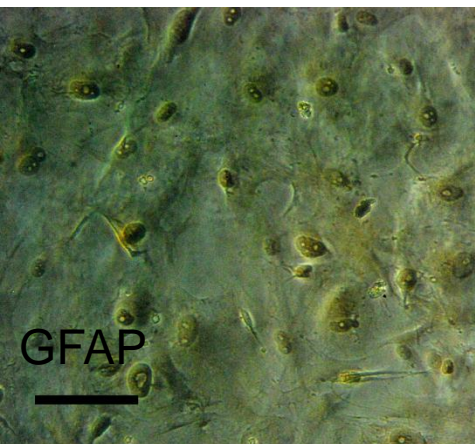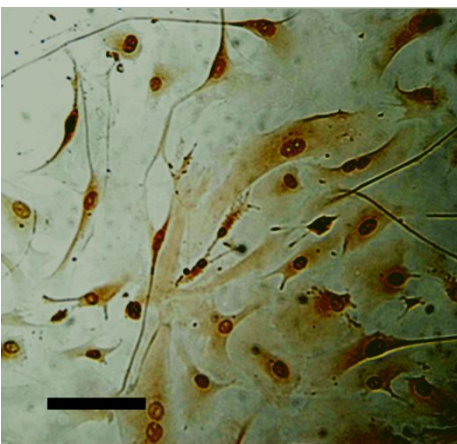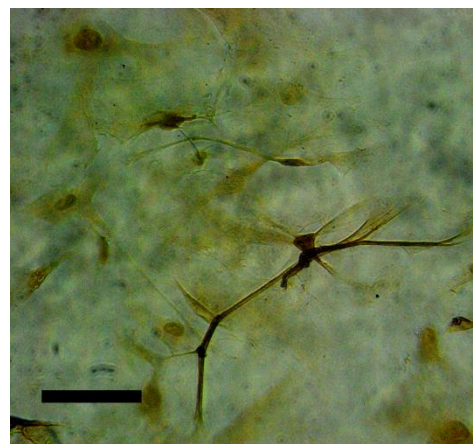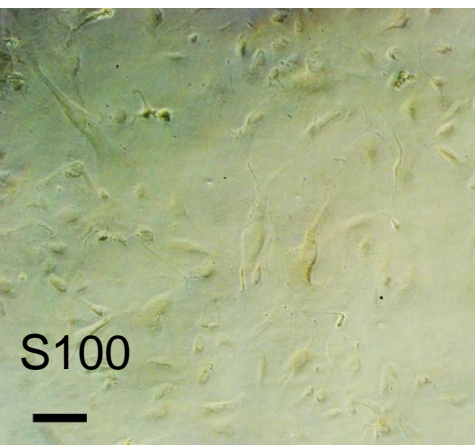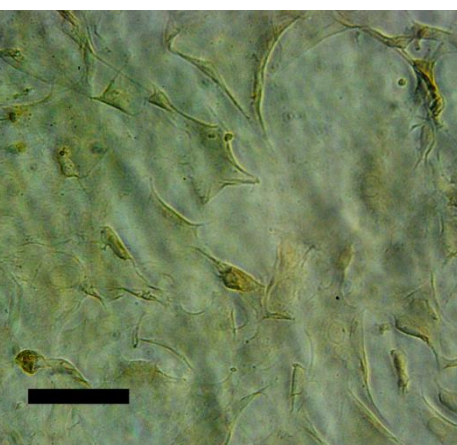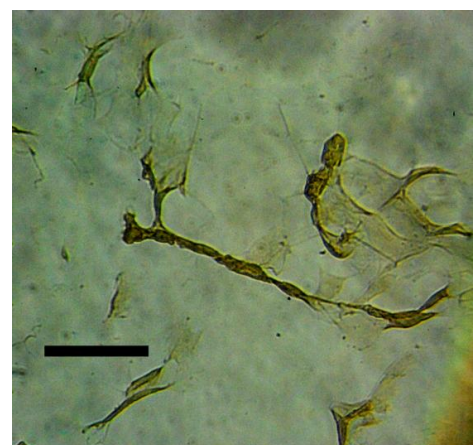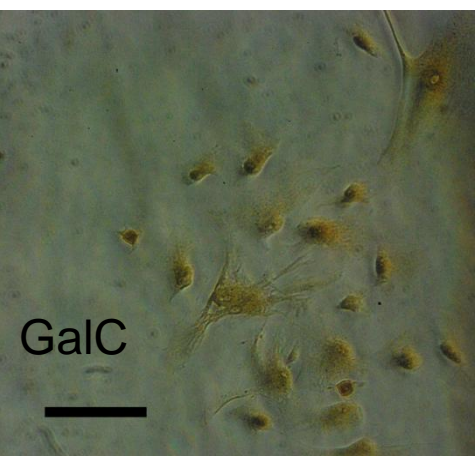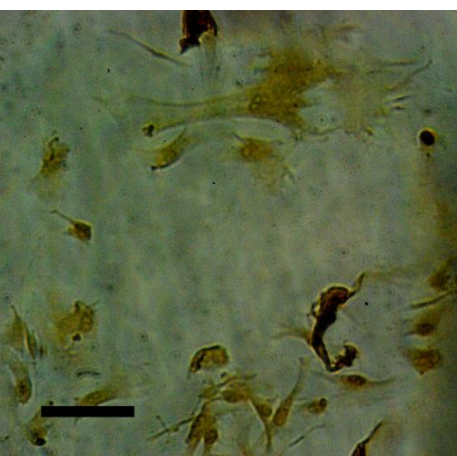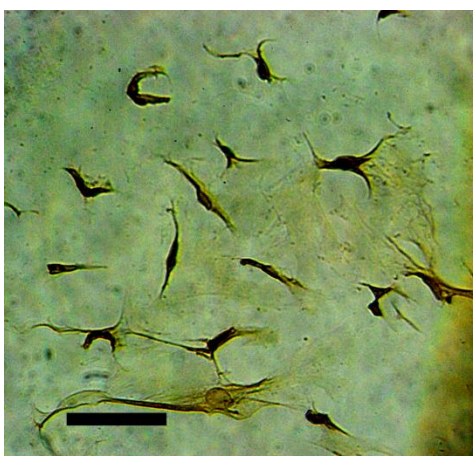

INNER ZONE

INTERMEDIATE ZONE

OUTER ZONE

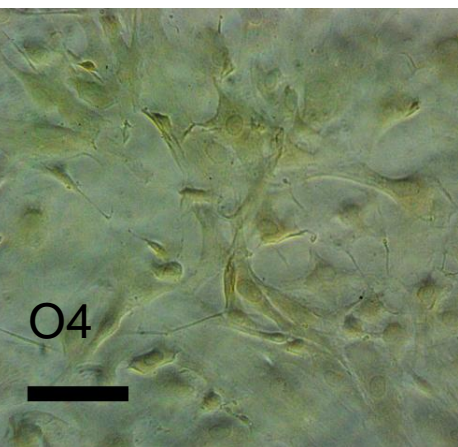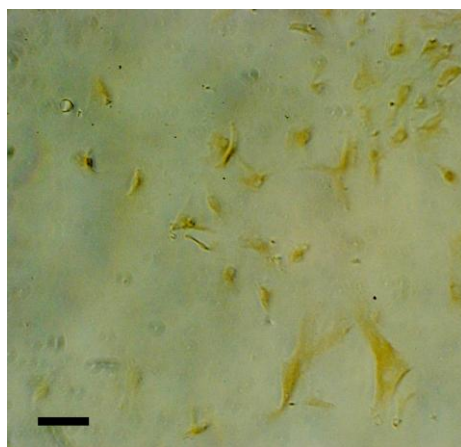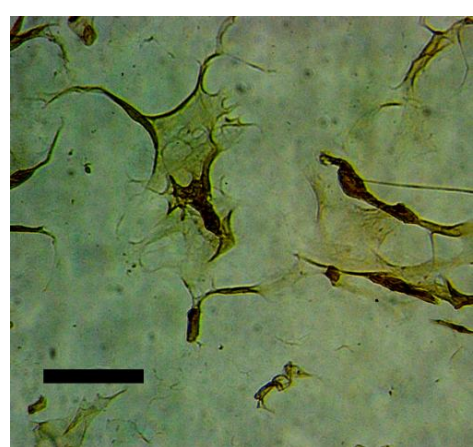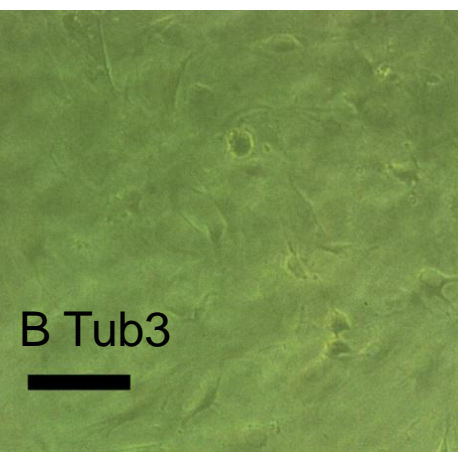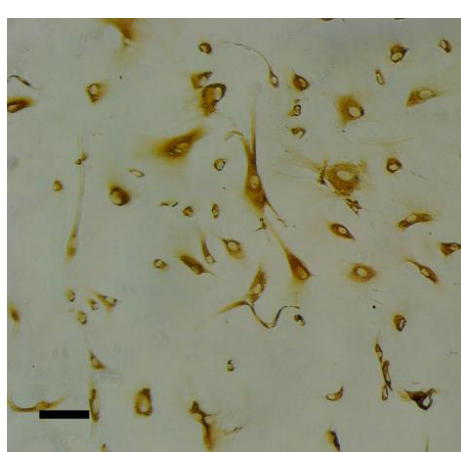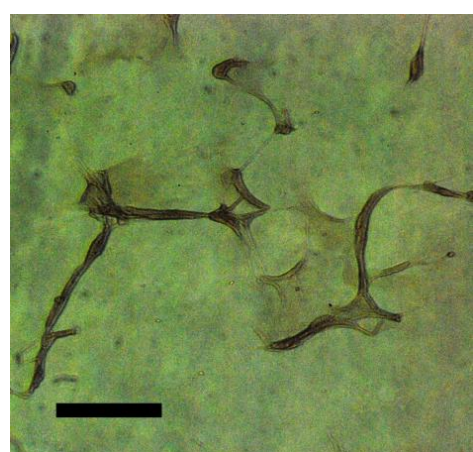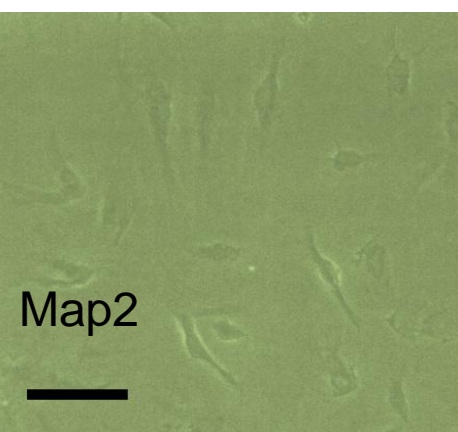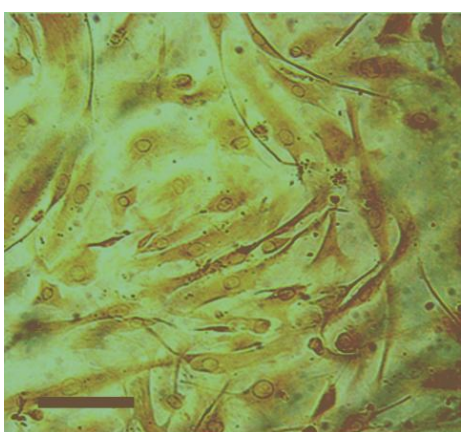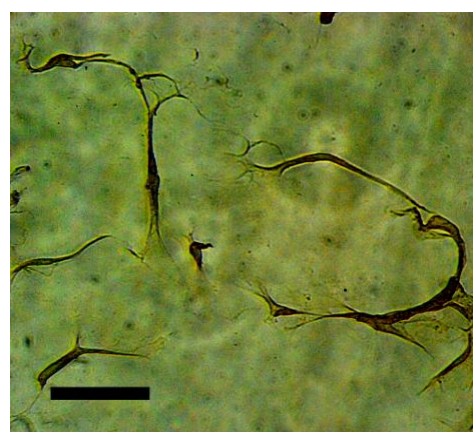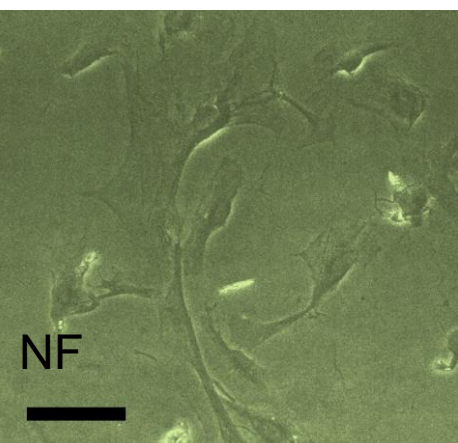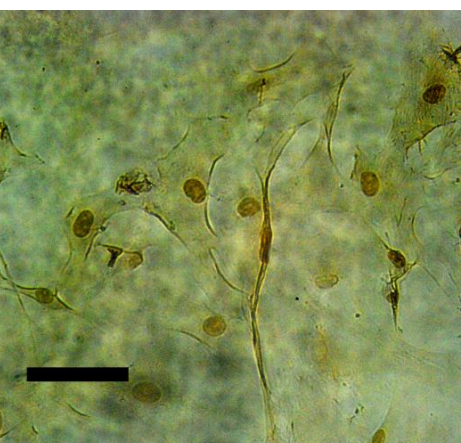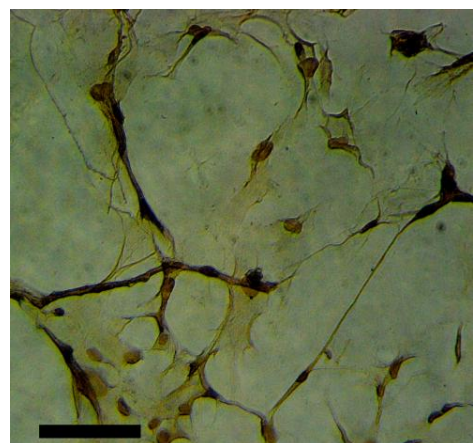

INNER ZONE

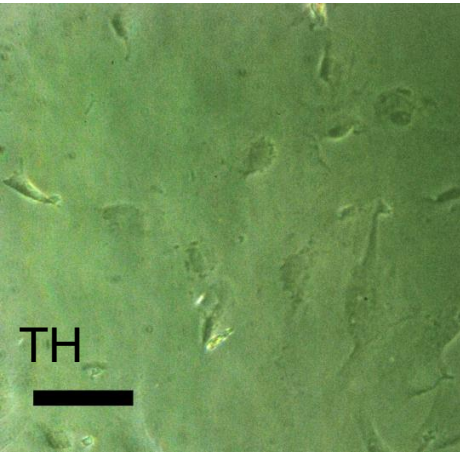

INTERMEDIATE ZONE

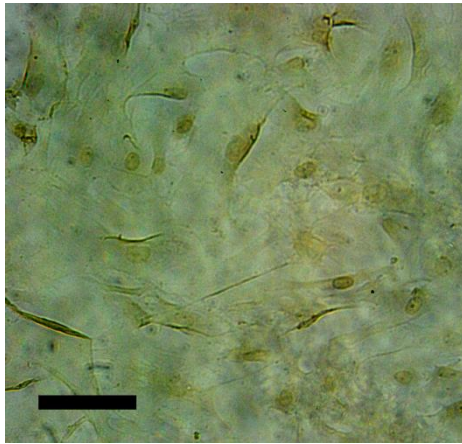

OUTER ZONE

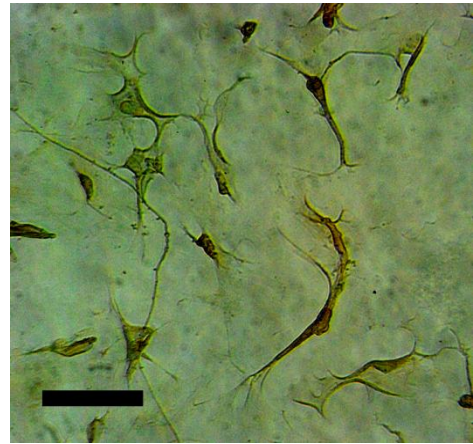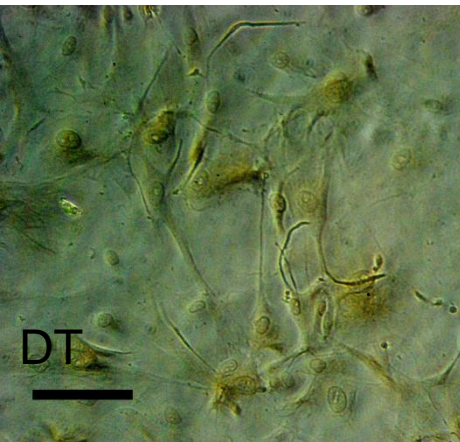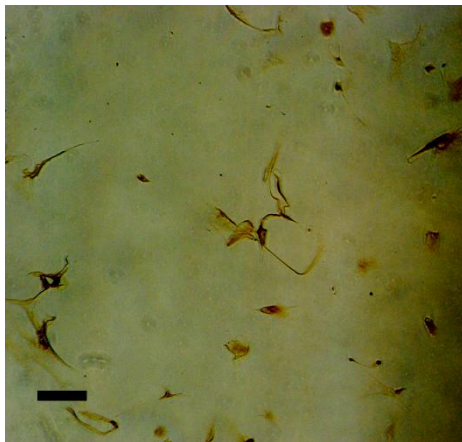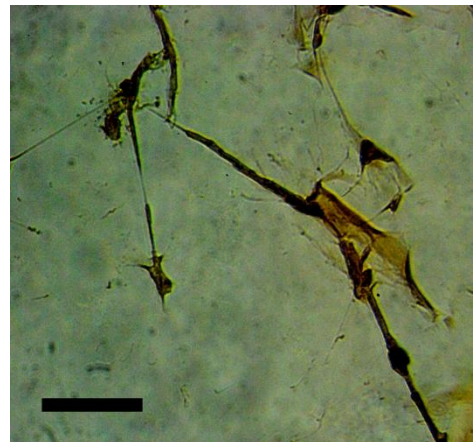

Supplement: pone.0071334.s001.pdf [file pone.0071334.s001.pdf]
